# Supplementary material for: The effect of MVK-MMAB variants, their haplotypes and G×E interactions on serum lipid levels and the risk of coronary heart disease and ischemic stroke
Source: PubMed Central journal article supplement (PMC5641170; doi:10.18632/oncotarget.20349), 2017-08-18
Supplement: oncotarget-08-72801-s001.pdf [file oncotarget-08-72801-s001.pdf]

# The effect of *MVK*-*MMAB* variants, their haplotypes and G×E interactions on serum lipid levels and the risk of coronary heart disease and ischemic stroke

## SUPPLEMENTARY MATERIALS

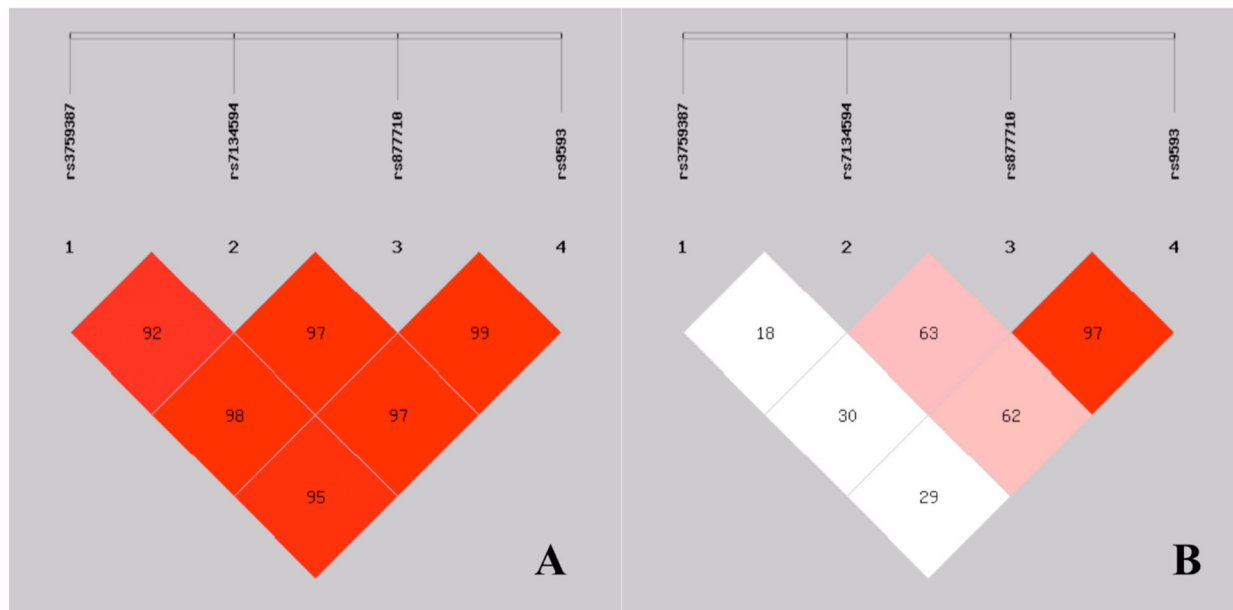

Supplementary Figure 1: The linkage disequilibrium (LD) analyses of the *MVK* rs3759387, *MMAB* rs877710, *MMAB* rs7134594 and *MMAB* rs9593 SNPs in the combined three groups. (A)  $D'$ ; (B)  $r^2$ .

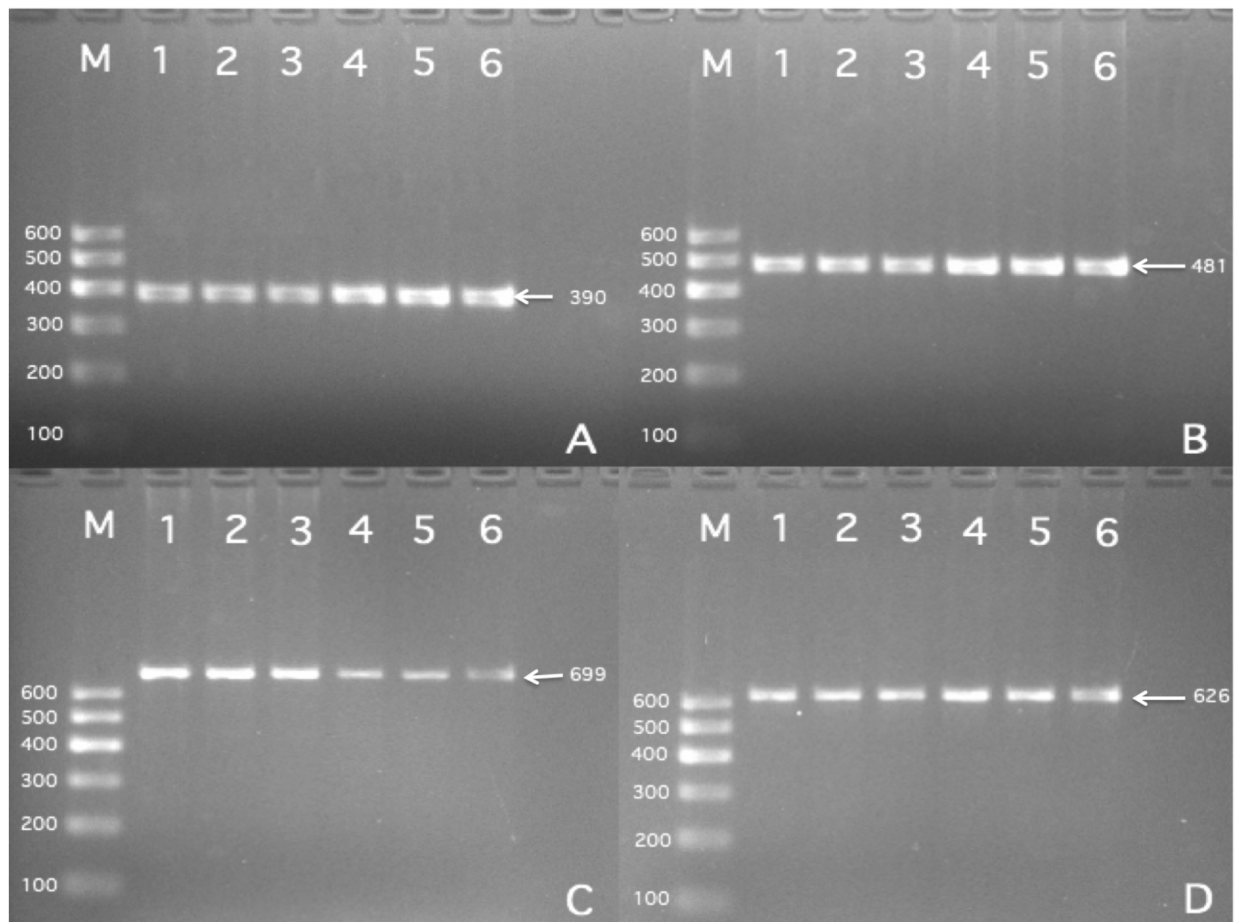

**Supplementary Figure 2: Agarose gel electrophoresis (2%) of PCR products of the *MVK* and *MMAB* SNPs.** Lane M: DNA ladder 100bp; PCR amplicon of (A) *MMAB* rs9593, (B) *MMAB* rs7134594, (C) *MVK* rs877710, (D) *MMAB* rs3759387 SNPs were 390-, 481-, 699- and 626-bp nucleotide sequences; respectively.

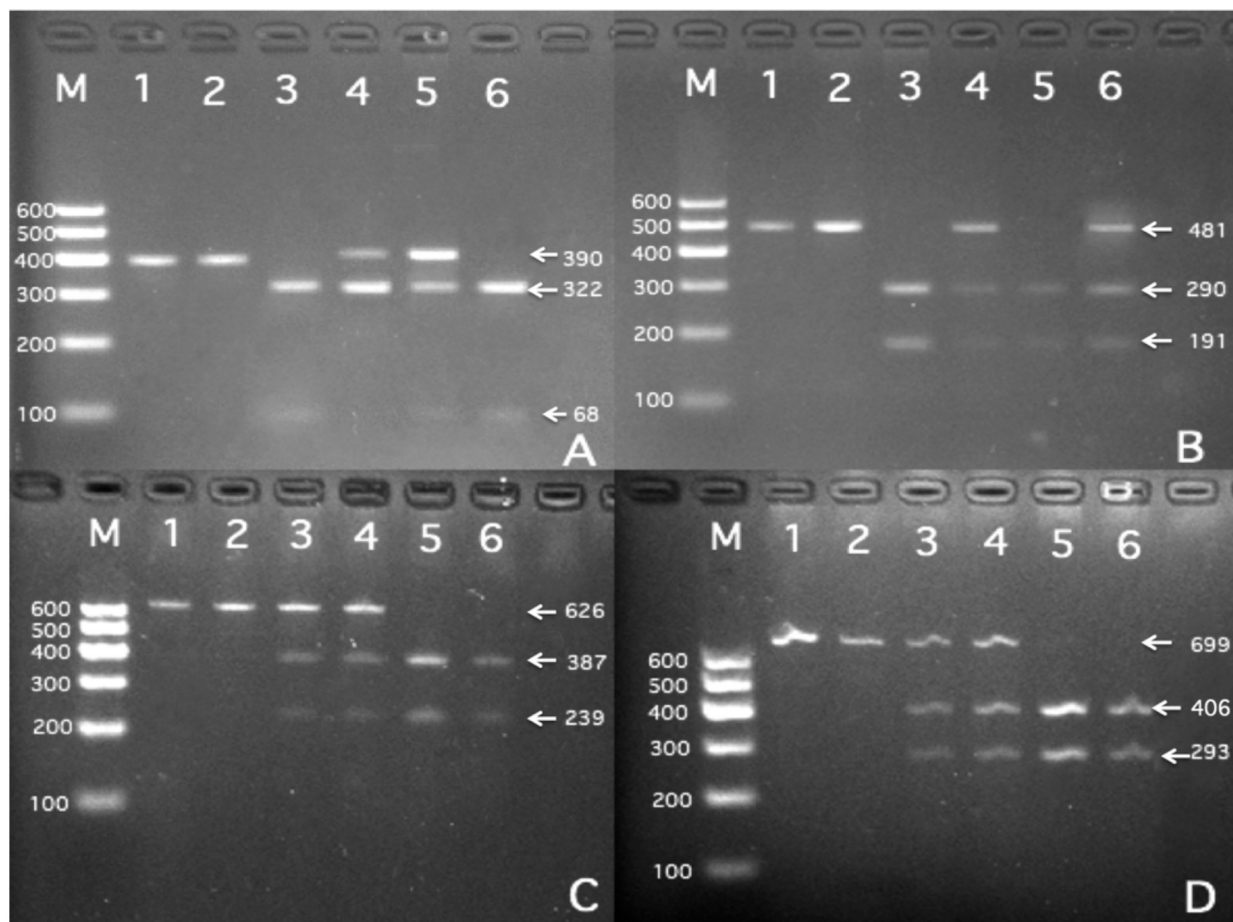

**Supplementary Figure 3: Agarose gel electrophoresis (2%) of genotyping of the *MVK* and *MMAB* SNPs.** Lane M: DNA ladder 100bp. The genotypes of 4 SNPs were as follow: **(A)** *MMAB* rs9593: AA (lanes 1 and 2, 390-bp); AT (lanes 4 and 5, 390-, 322- and 68-bp); and TT genotype (lanes 3 and 6, 322- and 68-bp). **(B)** *MMAB* rs7134594: CC (lanes 1 and 2, 481-bp); CT (lanes 4 and 6, 481-, 290- and 191-bp); and TT genotype (lanes 3 and 5, 290- and 191-bp). **(C)** *MVK* rs3759387: AA (lanes 1 and 2, 626-bp); AC (lanes 3 and 4, 626-, 387-, 239-bp); and CC genotype (lanes 5 and 6, 387- and 239-bp). **(D)** *MMAB* rs877710: CC (lanes 1 and 2, 699- bp); CT (lanes 3 and 4, 699-, 406- and 293-bp); and TT genotype (lanes 5 and 6, 406- and 293-bp).

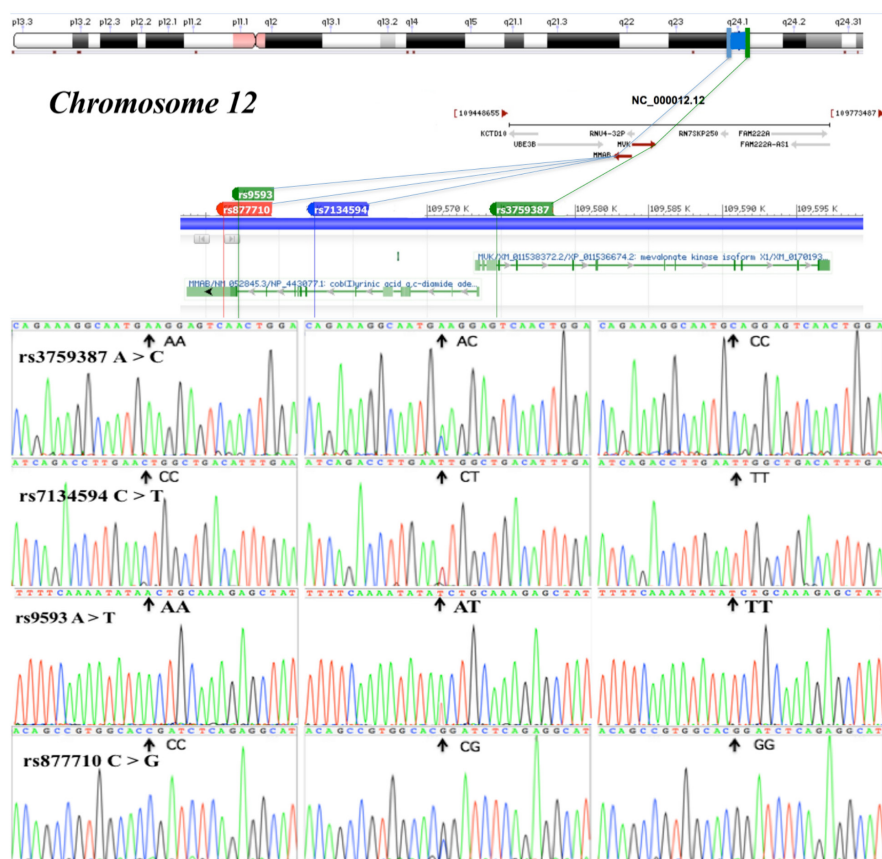

Supplementary Figure 4: The positions and parts of the nucleotide direct sequencing results of the *MVK* and *MMAB* SNPs. *MVK*, mevalonate kinase; *MMAB*, methylmalonic aciduria (cobalamin deficiency) cblB type.

Supplementary Table 1: The sequences of forward and backward primers of the *MVK-MMAB* mutations.

| SNP                | Primer sequence                               | Annealing temperature | PCR product | Enzyme         |
|--------------------|-----------------------------------------------|-----------------------|-------------|----------------|
| <b><i>MVK</i></b>  |                                               |                       |             |                |
| rs3759387          | TACCACGGCATGTTCTCCAT<br>GGCGTACTGGGTGTTTTCTG  | 61°C                  | 626bp       | <i>HpyCH4V</i> |
| rs877710           | AATATACCTGGCCCTCCTGC<br>GGGGAAGGATAGCTGCAGAT  | 61°C                  | 699bp       | <i>BstX2I</i>  |
| <b><i>MMAB</i></b> |                                               |                       |             |                |
| rs9593             | TCTCTCTGCCCCCTCCAGACT<br>TGAGAAGGAGCTGTGCGGAA | 61°C                  | 390bp       | <i>FaeI</i>    |
| rs7134594          | CCCCTAGTGCTGTCTTGTGA<br>CCAGACGGTTCCTCTTGACT  | 61°C                  | 481bp       | <i>BseI</i>    |
